# Supplementary material for: Subnuclear cyclin D3 compartments and the coordinated regulation of proliferation and immunoglobulin variable gene repression
Source: PubMed Central journal article supplement — J Exp Med. 2012 Nov 19;209(12):2199–213. doi: 10.1084/jem.20120800 (PMC3501354; doi:10.1084/jem.20120800), 2012-11-19
Supplement: supp_jem.20120800_JEM_20120800_sm.pdf [file supp_jem.20120800_JEM_20120800_sm.pdf]

SUPPLEMENTAL MATERIAL

Powers et al., <http://www.jem.org/cgi/content/full/jem.20120800/DC1>

**Table S1**

**Genes differentially expressed between WT and *Ccnd3*<sup>-/-</sup> Lin<sup>+</sup>B220<sup>+</sup>CD43<sup>hi</sup>IgM<sup>+</sup> pro-B cells.**

**Expressed Higher in WT relative to *Ccnd3*<sup>-/-</sup>**

| Gene Name/ID  | Mean Array Signal (WT) | Mean Array Signal ( <i>Ccnd3</i> <sup>-/-</sup> ) | Fold Change |
|---------------|------------------------|---------------------------------------------------|-------------|
| A030012G06Rik | 2.5928                 | 0.2336                                            | 11.33       |
| A230109K23Rik | 2.5928                 | 2.16591                                           | 2.672       |
| A830039N02Rik | 1.9659                 | 0.8318                                            | 13.617      |
| A930004K21Rik | 2.3963                 | 2.004                                             | 2.467       |
| AA545217      | 3.2065                 | 2.80061                                           | 2.546       |
| AB023957      | 2.352                  | 1.81381                                           | 3.452       |
| Abca3         | 2.1198                 | 1.2587                                            | 7.262       |
| Abcf1         | 2.8555                 | 2.4122                                            | 2.775       |
| Acd5          | 2.6789                 | 2.1584                                            | 3.315       |
| Acs1          | 2.6821                 | 2.2955                                            | 2.435       |
| Acvr1         | 2.2267                 | 1.8195                                            | 2.553       |
| Aebp2         | 2.0434                 | 1.4197                                            | 4.204       |
| AH494441      | 2.61                   | 1.99611                                           | 4.11        |
| AH61788       | 2.8344                 | 2.45241                                           | 2.354       |
| Aipl1         | 2.0195                 | 1.19821                                           | 6.626       |
| Akt1          | 2.2489                 | 1.82771                                           | 2.637       |
| Ankrd25       | 2.6266                 | 2.25631                                           | 2.345       |
| Anks1         | 2.3424                 | 1.9289                                            | 2.591       |
| Anin          | 2.9046                 | 2.3581                                            | 3.519       |
| Anub1         | 2.5107                 | 2.11411                                           | 2.492       |
| Apbb1ip       | 2.3765                 | 2.0137                                            | 2.305       |
| Apobec2       | 2.2821                 | 1.44181                                           | 6.922       |
| Arhgap11a     | 3.6095                 | 3.2215                                            | 2.443       |
| Arhgap19      | 2.6855                 | 2.1449                                            | 3.472       |
| Arhgap23      | 2.4765                 | 2.0963                                            | 2.399       |
| Arf13         | 2.4659                 | 0.3426                                            | 13.283      |
| Asf1b         | 3.4285                 | 2.952                                             | 2.995       |
| Aspm          | 3.4096                 | 2.7857                                            | 4.206       |
| Atp10a        | 2.6435                 | 2.34061                                           | 2.008       |
| Aurkb         | 3.1983                 | 2.6448                                            | 3.576       |
| AW320017      | 1.2929                 | 0.11831                                           | 14.948      |
| B130055D15Rik | 3.0093                 | 2.5443                                            | 2.917       |
| B230315F11Rik | 2.3435                 | 1.9657                                            | 2.386       |
| B430315C20Rik | 2.6301                 | 2.2918                                            | 2.179       |
| B93006720Rik  | 3.0695                 | 3.4796                                            | 3.889       |
| Balap2        | 2.1785                 | 1.6903                                            | 3.077       |
| Banf1         | 2.9073                 | 2.5647                                            | 2.702       |
| Bar1          | 2.7555                 | 2.0836                                            | 4.697       |
| BC004701      | 3.2057                 | 2.7821                                            | 2.652       |
| BC005512      | 3.5597                 | 2.8034                                            | 5.705       |
| BC022692      | 2.5855                 | 2.109                                             | 2.995       |
| BC028450      | 2.6032                 | 2.0437                                            | 3.626       |
| BC034753      | 2.5682                 | 1.7521                                            | 6.532       |
| Birc5         | 3.6783                 | 3.0535                                            | 4.215       |
| Brc1          | 3.2523                 | 2.7807                                            | 2.962       |
| Brp1          | 3.0044                 | 2.49021                                           | 3.267       |
| Brr1          | 3.0818                 | 2.44341                                           | 4.349       |
| Btbd14b       | 2.2825                 | 1.75301                                           | 3.384       |
| Bub1          | 3.0993                 | 2.4444                                            | 4.517       |
| Bub1b         | 2.4691                 | 1.832                                             | 4.336       |
| C030025P15Rik | 2.9535                 | 2.2007                                            | 4.313       |
| C130020C13Rik | 3.0888                 | 2.7619                                            | 2.122       |
| C230078M08Rik | 2.3633                 | 1.713                                             | 4.469       |
| C230096C10Rik | 2.5003                 | 2.0511                                            | 2.813       |
| C3            | 2.523                  | 1.9235                                            | 3.976       |
| C330027C09Rik | 3.3212                 | 2.72131                                           | 3.98        |
| C5ar1         | 2.8332                 | 2.423                                             | 2.571       |
| C79407        | 3.402                  | 2.7285                                            | 4.715       |
| C86302        | 3.0605                 | 2.5553                                            | 3.2         |
| Cacnb2        | 1.734                  | 0.5509                                            | 15.244      |
| Calmbp1       | 3.4295                 | 2.73701                                           | 4.925       |
| Camp          | 3.2955                 | 2.92101                                           | 2.368       |
| Carhsp1       | 3.3794                 | 3.0494                                            | 2.137       |
| Chc5          | 3.4125                 | 3.0711                                            | 2.194       |
| Cna2          | 3.4507                 | 2.77811                                           | 4.705       |
| Ccnb1         | 3.1676                 | 2.8165                                            | 2.244       |
| Ccnb2         | 3.5861                 | 3.1444                                            | 2.765       |
| Ccnd3         | 3.4902                 | 3.0088                                            | 3.029       |
| Ccne1         | 2.8437                 | 2.4533                                            | 2.456       |
| Ccnf          | 2.8266                 | 2.02911                                           | 6.273       |
| Cd44          | 3.0517                 | 2.6415                                            | 2.571       |
| Cd9           | 2.4567                 | 2.0885                                            | 2.334       |
| Cdc20         | 3.3124                 | 2.9345                                            | 2.387       |
| Cdc25c        | 3.0122                 | 2.3947                                            | 4.144       |
| Cdc2a         | 3.4027                 | 2.78511                                           | 4.145       |
| Cdc45l        | 3.1958                 | 2.3065                                            | 2.445       |
| Cdc6          | 3.2946                 | 2.90961                                           | 2.426       |
| Cdc7          | 3.2394                 | 2.74141                                           | 3.147       |
| Cdca1         | 3.3003                 | 2.70501                                           | 3.938       |
| Cdca2         | 3.5792                 | 2.5399                                            | 4.527       |
| Cdca3         | 3.5792                 | 3.05861                                           | 3.315       |
| Cdca5         | 3.3031                 | 2.6773                                            | 4.224       |
| Cdca8         | 3.0539                 | 2.4474                                            | 4.041       |
| Cdkn2c        | 3.2709                 | 2.7103                                            | 3.635       |
| Cdkn3         | 3.4923                 | 2.9235                                            | 3.713       |
| Cenpa         | 2.5645                 | 2.07031                                           | 3.12        |
| Cenpe         | 3.1082                 | 2.7416                                            | 2.325       |
| Cenpf         | 3.2705                 | 2.7353                                            | 3.429       |
| Cenph         | 3.3905                 | 3.04681                                           | 2.206       |
| Cenpk         | 3.3559                 | 1.7346                                            | 4.181       |
| Chc1          | 2.8449                 | 2.53311                                           | 2.05        |
| Chek1         | 3.2029                 | 2.8859                                            | 2.074       |
| Chek2         | 2.5785                 | 2.2395                                            | 2.182       |

**Expressed Higher in *Ccnd3*<sup>-/-</sup> Relative to WT**

| Gene Name/ID                               | Mean Array Signal (WT) | Mean Array Signal ( <i>Ccnd3</i> <sup>-/-</sup> ) | Fold Change |
|--------------------------------------------|------------------------|---------------------------------------------------|-------------|
| A130009E19Rik                              | 2.3933                 | 2.7429                                            | 2.236       |
| A130033P14                                 | 2.4833                 | 2.8044                                            | 2.094       |
| A630043P06                                 | 2.896                  | 3.22739                                           | 2.144       |
| A730016F12Rik                              | 0.955                  | 1.8355                                            | 7.594       |
| Abca1                                      | 2.5237                 | 2.88219                                           | 2.236       |
| Adprt3                                     | 2.9143                 | 3.2208                                            | 2.025       |
| Afap1                                      | 2.517                  | 2.81979                                           | 2.008       |
| Ag1                                        | 2.445                  | 2.7692                                            | 2.109       |
| Al225934                                   | 1.8338                 | 2.23119                                           | 2.496       |
| Al415330                                   | 1.1293                 | 2.2498                                            | 11.14       |
| Al987712                                   | 2.0206                 | 2.4099                                            | 2.45        |
| Anxa8                                      | 1.1314                 | 1.9142                                            | 6.064       |
| Appbp2                                     | -0.4487                | 1.0482                                            | 31.397      |
| Arpp21                                     | 2.5307                 | 2.65279                                           | 2.099       |
| Arred4                                     | 1.9861                 | 2.34759                                           | 2.298       |
| B230312A22Rik                              | 2.0695                 | 2.4302                                            | 2.294       |
| B430119L13Rik                              | 2.1581                 | 2.48669                                           | 2.131       |
| B830008H07Rik                              | 1.4628                 | 2.26719                                           | 6.373       |
| BB220380                                   | 2.8937                 | 3.216                                             | 2.1         |
| BC020535                                   | 2.1872                 | 2.5774                                            | 2.455       |
| BC026657                                   | 0.6915                 | 1.85559                                           | 14.591      |
| BC031781                                   | -0.4488                | 0.66329                                           | 12.944      |
| BC036961                                   | 2.5873                 | 3.1501                                            | 3.654       |
| Bcl11a                                     | 3.0453                 | 3.3669                                            | 2.097       |
| Bcl11b                                     | 2.0466                 | 2.45579                                           | 2.565       |
| Bcl11d /// Bcl2a1b /// Bcl2a1c /// Bcl2a1a | 0.136                  | 1.20849                                           | 11.814      |
| Bhlhb2                                     | 0.7441                 | 1.9466                                            | 15.94       |
| Bmf                                        | 2.6247                 | 2.9299                                            | 2.019       |
| C030011O14Rik                              | 2.8883                 | 3.19949                                           | 2.047       |
| C130026M15Rik                              | 2.6711                 | 2.6711                                            | 95.477      |
| C130047D21Rik                              | 2.4431                 | 2.7903                                            | 2.224       |
| C230085N15Rik                              | 2.2557                 | 2.6583                                            | 2.526       |
| C330008K14Rik                              | 1.2428                 | 2.2959                                            | 11.3        |
| C79248                                     | 3.018                  | 3.3773                                            | 2.287       |
| C85492                                     | 2.2954                 | 2.2954                                            | 2.337       |
| Cacna1b                                    | 2.2094                 | 2.7898                                            | 3.805       |
| Cacna1e                                    | 2.7086                 | 3.01319                                           | 2.016       |
| Camk2d                                     | 2.0471                 | 2.4556                                            | 2.561       |
| Capn1                                      | 2.1236                 | 2.1276                                            | 8.203       |
| Catns                                      | 2.8653                 | 3.1698                                            | 2.016       |
| Cbr1                                       | 2.2294                 | 2.58849                                           | 2.286       |
| Cc27                                       | 2.7272                 | 3.0312                                            | 2.013       |
| Cc28                                       | 2.1252                 | 2.5826                                            | 2.861       |
| Ccnd2                                      | 2.9047                 | 3.31649                                           | 2.581       |
| Ceacam2                                    | 1.8232                 | 2.22                                              | 2.493       |
| Centb1                                     | 2.4886                 | 2.8243                                            | 2.166       |
| Cep1                                       | -0.0262                | 0.9518                                            | 9.504       |
| Cib1                                       | 1.8513                 | 2.5071                                            | 4.526       |
| Cish                                       | 2.3019                 | 2.6477                                            | 2.217       |
| Cic1                                       | 2.6634                 | 3.12069                                           | 2.866       |
| Cldn16                                     | 0.3275                 | 1.309                                             | 9.582       |
| Cococacrisp                                | -0.7497                | 0.42239                                           | 14.862      |
| Commnd9                                    | 3.0572                 | 3.4786                                            | 2.638       |
| Coq7                                       | 3.1491                 | 3.5203                                            | 2.35        |
| Cribp                                      | 2.6589                 | 3.09819                                           | 2.749       |
| Crim1                                      | 0.8686                 | 1.9653                                            | 12.493      |
| Csen                                       | 2.1503                 | 2.63539                                           | 3.055       |
| Cspg2                                      | 1.4566                 | 2.0512                                            | 3.931       |
| Ctcf1                                      | 1.8264                 | 2.30319                                           | 2.997       |
| Cyp11a1                                    | 2.2048                 | 2.6788                                            | 2.958       |
| Cyp27a1                                    | 1.6233                 | 2.15289                                           | 3.385       |
| Cyslr1                                     | 2.2402                 | 2.68789                                           | 2.803       |
| D18Erd653e                                 | 2.6679                 | 3.05799                                           | 2.455       |
| D23007K08Rik                               | 2.4575                 | 2.7768                                            | 2.085       |
| D2Bwg1335e                                 | 2.2375                 | 2.58509                                           | 2.226       |
| D2Erd173e                                  | 2.5164                 | 2.8786                                            | 2.302       |
| D730046L02Rik                              | -0.1928                | 1.1609                                            | 22.578      |
| D8Erd4531e                                 | 3.128                  | 3.45409                                           | 2.118       |
| Dcd                                        | 0.7345                 | 1.8063                                            | 11.797      |
| Ddc                                        | 2.5494                 | 2.8876                                            | 2.178       |
| Ddx3y                                      | 0.0997                 | 2.8451                                            | 556.416     |
| Dhpk                                       | 2.4575                 | 2.6514                                            | 2.249       |
| Dnajb10                                    | 2.1263                 | 2.54179                                           | 2.603       |
| Dnajb7                                     | 2.1802                 | 2.62329                                           | 2.832       |
| Dpm3                                       | 2.2863                 | 2.6916                                            | 2.019       |
| Dpm2                                       | 2.0213                 | 2.39539                                           | 2.366       |
| Dsg1a                                      | -0.2648                | 0.8352                                            | 12.589      |
| Dusp15                                     | 0.5521                 | 1.5665                                            | 10.337      |
| E030026I10Rik                              | 0.4833                 | 1.5956                                            | 12.95       |
| E030045D18Rik                              | 0.7903                 | 10.214                                            | 7.995       |
| E130308A19Rik                              | 2.6234                 | 2.95109                                           | 2.126       |
| Edg3                                       | 1.982                  | 2.5586                                            | 3.772       |
| Efna5                                      | 0.6625                 | 1.83139                                           | 14.753      |
| Ehd3                                       | 1.6664                 | 2.5265                                            | 7.246       |
| Fbxo10                                     | 0.5808                 | 3.5562                                            | 944.93      |
| Eltid1                                     | 1.946                  | 2.3552                                            | 2.565       |
| Eps8l2                                     | 2.0693                 | 2.45049                                           | 2.405       |
| Fam65b                                     | 2.3069                 | 2.6211                                            | 2.061       |
| Fbxo10                                     | 2.3879                 | 2.71469                                           | 2.122       |
| Fbxo32                                     | 2.3148                 | 2.6512                                            | 2.169       |
| Fcgr2b                                     | -0.4884                | 0.6357                                            | 13.307      |
| Fchs2                                      | 1.6722                 | 2.18679                                           | 3.27        |
| Fjk1                                       | 2.0397                 | 2.4403                                            | 2.515       |

|                                                                                                                                                            |        |         |        |           |         |         |         |
|------------------------------------------------------------------------------------------------------------------------------------------------------------|--------|---------|--------|-----------|---------|---------|---------|
| Chi33                                                                                                                                                      | 3.3803 | 2.89171 | 3.08   | Frap1     | 2.3502  | 2.7486  | 2.502   |
| Chi34 /// Chi33                                                                                                                                            | 3.1185 | 2.6357  | 3.039  | Furin     | 2.6265  | 2.93089 | 2.015   |
| Cit                                                                                                                                                        | 2.6802 | 2.0645  | 4.127  | Fab8      | 0.4945  | 1.7417  | 17.668  |
| Ckap2                                                                                                                                                      | 2.9032 | 2.524   | 2.394  | Gbe1      | 2.0297  | 2.54669 | 3.288   |
| Cks1b                                                                                                                                                      | 3.5408 | 3.1885  | 2.25   | Gckr      | 0.8254  | 1.8145  | 9.752   |
| Cks2                                                                                                                                                       | 3.8534 | 3.53461 | 2.083  | Ggnbp1    | 2.3732  | 2.6789  | 2.021   |
| Clec4e6                                                                                                                                                    | 1.7698 | 0.825   | 8.806  | Gli1      | 3.0435  | 3.4504  | 2.552   |
| Clec4e8                                                                                                                                                    | 2.4482 | 2.0894  | 2.284  | Gm12576   | 2.2002  | 2.53279 | 2.252   |
| Clsn                                                                                                                                                       | 3.2175 | 2.55111 | 4.638  | Gm457     | 3.1425  | 3.4529  | 2.043   |
| Cml3                                                                                                                                                       | 2.5726 | 1.97041 | 4.001  | Gm644     | 2.1061  | 2.6884  | 3.822   |
| Col25a1                                                                                                                                                    | 1.8652 | 0.9589  | 8.059  | Gm9866    | 0.4091  | 1.4193  | 10.237  |
| Col4a5                                                                                                                                                     | 1.7011 | 0.33021 | 23.49  | Gm94      | 1.6895  | 2.5766  | 7.771   |
| Cpd                                                                                                                                                        | 2.4938 | 2.0449  | 2.811  | Gpr132    | 2.5462  | 2.848   | 2.003   |
| Cpne3                                                                                                                                                      | 2.781  | 2.472   | 2.037  | Gpr97     | 2.3868  | 2.93219 | 3.51    |
| Ctsl                                                                                                                                                       | 1.8396 | 0.69721 | 13.88  | Gprcb     | 1.8488  | 2.3506  | 3.175   |
| Cyhr1                                                                                                                                                      | 2.9496 | 2.54381 | 2.026  | Grs10     | 2.2128  | 2.66309 | 2.82    |
| D030011O10Rik                                                                                                                                              | 2.6792 | 2.22651 | 2.835  | Grna      | 2.7926  | 3.10689 | 2.062   |
| D030028M11Rik                                                                                                                                              | 3.197  | 2.76821 | 2.684  | H2-Ob     | 3.4574  | 3.7608  | 2.01    |
| D03005121Rik                                                                                                                                               | 1.0766 | 0.1111  | 9.236  | H2-Q1     | 1.4845  | 2.0775  | 3.917   |
| D15Entd785e                                                                                                                                                | 3.0371 | 2.7483  | 2.036  | H2B       | 0.8189  | 3.0086  | 154.774 |
| D230005D02Rik                                                                                                                                              | 1.4701 | 0.41461 | 11.362 | Haao      | 2.1853  | 2.6456  | 2.886   |
| D2Ertd750e                                                                                                                                                 | 3.1232 | 2.7492  | 2.365  | Hdac11    | 2.6238  | 2.93879 | 2.065   |
| D5Ertd606e                                                                                                                                                 | 3.1685 | 2.86111 | 2.029  | Hectd1    | 1.8708  | 2.42609 | 3.591   |
| D930008O12Rik                                                                                                                                              | 1.9055 | 0.8167  | 12.268 | Hoxc8     | -0.1617 | 0.891   | 11.29   |
| Dcka1                                                                                                                                                      | 1.0603 | -0.296  | 22.714 | Htra3     | 1.6864  | 2.1858  | 3.157   |
| Defa3                                                                                                                                                      | 2.4786 | 2.0377  | 2.759  | Ifitm1    | 2.4137  | 2.7694  | 2.268   |
| DeK                                                                                                                                                        | 3.0454 | 2.67681 | 2.336  | Igf1      | 2.2322  | 2.95259 | 4.259   |
| Demnd5b                                                                                                                                                    | 2.3309 | 1.9757  | 2.265  | Igh-VJ558 | 3.0257  | 3.6509  | 4.214   |
| Depdcl1a                                                                                                                                                   | 2.5107 | 1.80371 | 5.093  | Ighg      | 3.1541  | 3.69819 | 3.5     |
| Depdcl1b                                                                                                                                                   | 2.8259 | 2.24961 | 3.769  | Igj       | 2.5953  | 3.0826  | 3.071   |
| Dhrs7                                                                                                                                                      | 2.3593 | 1.4431  | 8.245  | Igk-V1    | 2.4223  | 2.9698  | 3.527   |
| Diap3                                                                                                                                                      | 2.8126 | 2.15591 | 4.536  | Igl-V1    | 2.7266  | 3.26609 | 3.463   |
| Dlpa2                                                                                                                                                      | 3.0727 | 2.7597  | 2.055  | Ii1ra     | 2.0571  | 2.44039 | 2.417   |
| Dlq7                                                                                                                                                       | 2.544  | 1.9595  | 3.841  | Jarid1b   | 2.7685  | 3.12279 | 2.26    |
| Dnmt1                                                                                                                                                      | 3.2074 | 2.8549  | 2.251  | Jarid1d   | 0.8883  | 2.8178  | 85.015  |
| Dn                                                                                                                                                         | 2.6929 | 2.2514  | 2.763  | Jarid2    | 2.5168  | 2.8576  | 2.191   |
| Dusp10                                                                                                                                                     | 2.2329 | 1.62099 | 3.917  | Kcnc1ot1  | 2.2292  | 2.69749 | 2.129   |
| E030003F13Rik                                                                                                                                              | 2.8945 | 2.59241 | 2.004  | KIF3      | 1.8784  | 2.28    | 2.521   |
| E130016E03Rik                                                                                                                                              | 2.5081 | 1.26491 | 17.506 | Klhdc1    | 2.2095  | 2.6192  | 2.568   |
| E130115121Rik                                                                                                                                              | 3.0615 | 2.7106  | 2.243  | Klhl14    | 2.2134  | 2.7147  | 3.171   |
| E130306O19Rik                                                                                                                                              | 1.3818 | 1.7901  | 3.905  | Lhb       | 2.4774  | 2.7517  | 2.11    |
| E2f7                                                                                                                                                       | 2.7216 | 2.1401  | 3.815  | Leprel1   | 0.1221  | 1.2133  | 12.336  |
| Ect2                                                                                                                                                       | 3.124  | 2.5961  | 3.372  | Lhx3      | 0.9501  | 1.87429 | 8.398   |
| Efra2                                                                                                                                                      | 2.0165 | 1.3151  | 5.028  | Lipc      | 0.9731  | 2.2576  | 19.253  |
| Egfr5                                                                                                                                                      | 2.4605 | 1.8681  | 3.912  | Lrrtm2    | 2.3082  | 2.6531  | 2.212   |
| Enpp1                                                                                                                                                      | 2.0783 | 1.1088  | 9.321  | Msh5      | 2.6059  | 2.93949 | 2.155   |
| Eri2                                                                                                                                                       | 2.6456 | 2.30601 | 2.185  | Mtor      | 2.2299  | 2.5954  | 2.32    |
| Eso2                                                                                                                                                       | 3.1431 | 2.2902  | 7.126  | Mxd4      | 3.4906  | 3.80039 | 2.04    |
| Esp1                                                                                                                                                       | 2.7698 | 2.2094  | 3.634  | Mxd1b     | 0.4128  | 1.41799 | 10.12   |
| Evi                                                                                                                                                        | 1.7168 | 0.3356  | 24.054 | Myom2     | 2.6133  | 3.0765  | 2.905   |
| Exo1                                                                                                                                                       | 2.7011 | 2.30981 | 2.462  | Nalcn     | -0.1432 | 0.88429 | 10.653  |
| Eya1                                                                                                                                                       | 2.5769 | 2.1476  | 2.687  | Nanog     | 0.0848  | 1.1251  | 10.972  |
| F630043A04Rik                                                                                                                                              | 2.4663 | 1.94161 | 3.347  | Nesf1     | 2.9959  | 3.311   | 2.065   |
| F730047E07Rik                                                                                                                                              | 2.6138 | 2.23511 | 2.39   | Nme1      | 2.6623  | 3.0476  | 2.428   |
| Fancd2                                                                                                                                                     | 2.2029 | 1.5294  | 4.715  | Npas3     | 0.3351  | 1.4438  | 12.843  |
| Fbxo30                                                                                                                                                     | 2.4098 | 1.5816  | 6.732  | Nphp1     | 1.6775  | 2.23769 | 3.632   |
| Fbxo5                                                                                                                                                      | 3.3584 | 2.8028  | 3.594  | Ohrl5     | 0.0458  | 1.0106  | 9.221   |
| Fen1                                                                                                                                                       | 2.6881 | 2.28851 | 2.509  | Ohrl9     | 0.9519  | 1.91029 | 8.222   |
| Fgf13                                                                                                                                                      | 2.4457 | 1.88201 | 3.661  | Osgp      | 2.4069  | 2.761   | 2.259   |
| Fign1                                                                                                                                                      | 3.2614 | 2.90981 | 2.246  | Pcdh9     | 1.5451  | 2.4515  | 8.061   |
| Fkbp5                                                                                                                                                      | 2.1754 | 1.62401 | 3.559  | Pcdhb16   | 1.8994  | 2.3127  | 2.59    |
| Fmn2                                                                                                                                                       | 2.1799 | 1.67331 | 3.21   | Pcdhb20   | 0.2396  | 1.7072  | 29.349  |
| Fosl1                                                                                                                                                      | 1.2003 | 0.16051 | 10.959 | Pdk1      | 2.6303  | 2.9872  | 2.274   |
| Foxm1                                                                                                                                                      | 2.5982 | 1.54841 | 11.214 | Pdk2      | 2.7081  | 3.0131  | 2.018   |
| Fshpp1                                                                                                                                                     | 2.5938 | 1.96791 | 4.225  | Pdk3      | 2.0013  | 2.37369 | 2.357   |
| Fthsdcl1                                                                                                                                                   | 3.1325 | 2.798   | 2.111  | Pf2       | 2.7568  | 3.13569 | 2.392   |
| Gabbr1                                                                                                                                                     | 1.3372 | 0.33451 | 10.062 | Pim1      | 2.0451  | 2.76149 | 5.204   |
| Gins3                                                                                                                                                      | 2.6116 | 2.2357  | 2.376  | Plk2      | 2.196   | 2.71149 | 3.277   |
| Gm5480                                                                                                                                                     | 2.5837 | 2.01311 | 3.72   | Plxn3     | 1.62    | 2.3483  | 5.349   |
| Gm6747                                                                                                                                                     | 1.1898 | -0.0802 | 17.782 | Ppp19a    | 1.6247  | 2.3359  | 5.142   |
| Gmn                                                                                                                                                        | 3.6461 | 3.32271 | 2.105  | Ppt1      | 2.1411  | 2.5027  | 2.299   |
| Gpsm2                                                                                                                                                      | 2.8444 | 2.3394  | 3.198  | Prg3      | 2.2152  | 2.66129 | 2.793   |
| Gramd2                                                                                                                                                     | 2.1618 | 1.64121 | 3.315  | Prir      | 1.8766  | 2.33159 | 2.85    |
| Gsp2                                                                                                                                                       | 2.7201 | 2.2788  | 2.762  | Prrp      | 1.9458  | 2.6587  | 5.162   |
| Gtse1                                                                                                                                                      | 2.5214 | 1.71811 | 6.357  | Ptprf     | 0.8459  | 1.8563  | 10.242  |
| H2-M3                                                                                                                                                      | 3.5609 | 2.882   | 4.774  | Qprt      | 0.6941  | 1.7023  | 10.19   |
| H2afx                                                                                                                                                      | 3.7367 | 3.14761 | 3.882  | Rab11fip5 | 2.8495  | 3.2528  | 2.531   |
| Hcf1                                                                                                                                                       | 2.9599 | 2.6275  | 2.149  | Rab7      | 0.2787  | 1.2536  | 19.21   |
| Hcr                                                                                                                                                        | 2.6628 | 2.3545  | 2.033  | Rab2b     | 2.6218  | 2.9426  | 2.093   |
| Hist1h2ad                                                                                                                                                  | 3.8119 | 3.4508  | 2.296  | Rab4a     | 1.8077  | 2.7583  | 8.924   |
| Hist1h2bp                                                                                                                                                  | 3.7437 | 3.4     | 2.206  | Rab6b     | 2.7037  | 3.1153  | 2.579   |
| Hist1h3a /// Hist1h3i /// Hist1h3e /// Hist1h3f /// Hist1h3d /// Hist2h3b /// Hist1h3h /// Hist2h3c-2 /// Hist1h3b /// Hist1h3c /// Hist1h3g /// Hist2h3c1 | 3.6293 | 3.1751  | 2.83   | Rabpm3    | 2.6203  | 2.9511  | 2.141   |
| Hist1h3 /// Hist1h3e /// Hist1h3f /// Hist1h3d /// Hist2h3b /// Hist1h3h /// Hist1h3b /// Hist2h3e /// Hist2h3c1                                           | 2.6023 | 2.16781 | 2.719  | Rgs3      | 0.9429  | 1.8395  | 7.912   |
| Hist1h4f /// Hist1h4b /// Hist1h4i /// Hist1h4m /// Hist1h4a                                                                                               | 2.9264 | 2.4775  | 2.811  | Rmst      | 0.0095  | 0.9773  | 9.285   |
| Hist1h4k /// Hist1h4j /// Hist1h4m                                                                                                                         | 1.7686 | 0.82531 | 8.775  | Sbsn      | 2.0555  | 2.3954  | 2.187   |
| Hist2h2aa2                                                                                                                                                 | 3.6632 | 3.23781 | 2.663  | Scal      | 2.3886  | 2.7127  | 2.109   |
| Hmbs                                                                                                                                                       | 3.0934 | 2.68771 | 2.545  | Scamp1    | 1.7161  | 2.2294  | 2.626   |
| Hmnc1                                                                                                                                                      | 1.7832 | 0.13861 | 44.115 | Scd1      | 2.6534  | 3.039   | 2.429   |
| Hmga2                                                                                                                                                      | 1.4107 | 0.375   | 10.856 | Scml4     | 1.8151  | 2.24299 | 2.678   |
| Hmgp3                                                                                                                                                      | 1.0791 | -0.0496 | 13.449 | Scn4b     | 3.1673  | 3.57819 | 2.575   |
| Hmnm                                                                                                                                                       | 3.1808 | 3.6646  | 3.282  | Sc22a     | 2.1619  | 2.55689 | 2.483   |
| Hoxc9                                                                                                                                                      | 1.7259 | 0.8004  | 8.423  | Sema6c    | 0.6879  | 1.7125  | 10.582  |
| Hs2st1                                                                                                                                                     | 2.1727 | 1.46611 | 5.088  | Sema6d    | 0.801   | 1.52859 | 14.076  |
| Hspa2                                                                                                                                                      | 3.468  | 3.1557  | 2.052  | Sema7a    | 2.1731  | 2.6124  | 2.749   |
| Hsp                                                                                                                                                        | 1.3657 | 0.0486  | 20.753 | Sema7b    | 1.9114  | 2.31539 | 2.535   |
| Ide                                                                                                                                                        | 2.7442 | 2.3867  | 2.277  | Serpinh1  | 0.4083  | 1.97889 | 37.204  |
| Ier3                                                                                                                                                       | 1.6477 | 0.68031 | 9.276  | Sic16a11  | 1.1232  | 1.9172  | 6.223   |
| Igfb1                                                                                                                                                      | 0.7363 | -0.2881 | 10.577 | Sic2a9    | 3.0317  | 3.4192  | 2.44    |
| Igfb4d                                                                                                                                                     | 0.7538 | -0.2397 | 9.851  | Sic2a     | 1.6841  | 2.16889 | 3.053   |
| Incnp                                                                                                                                                      | 3.2422 | 2.6757  | 3.685  | Sic6a19   | 0.3529  | 1.58389 | 17.021  |
| Ing5                                                                                                                                                       | 2.3892 | 1.98711 | 2.524  | Sit12     | 2.2474  | 2.5918  | 2.21    |
| Itk                                                                                                                                                        | 1.3419 | 0.18711 | 14.282 | Snitg2    | 0.5445  | 1.8303  | 19.31   |

|           |        |         |        |                      |         |         |         |
|-----------|--------|---------|--------|----------------------|---------|---------|---------|
| Kcnab1    | 1.7051 | 0.44131 | 18.356 | Spag16               | -0.4003 | 0.9194  | 20.878  |
| Kif11     | 3.4955 | 2.79191 | 5.053  | Spint2               | 2.9097  | 3.2137  | 2.013   |
| Kif14     | 2.1248 | 1.3885  | 5.448  | Spsl1                | 2.5223  | 2.89909 | 2.381   |
| Kif18a    | 2.181  | 1.2186  | 9.17   | Spp2                 | 0.356   | 1.4024  | 11.127  |
| Kif20a    | 3.4219 | 3.0378  | 2.421  | Sulf2                | 1.7635  | 2.1962  | 2.708   |
| Kif22     | 3.4752 | 2.8245  | 4.474  | Synpo2l              | 2.204   | 2.50909 | 2.018   |
| Kif23     | 3.352  | 2.80281 | 3.541  | Tcf7l2               | 2.1519  | 2.4436  | 2.049   |
| Kif24     | 2.433  | 2.17111 | 2.3    | Tcfp4                | 0.1707  | 1.5037  | 21.527  |
| Kif2c     | 2.3245 | 1.6223  | 5.037  | Tctc                 | 2.0515  | 2.4157  | 2.313   |
| Kif4      | 3.0498 | 2.46401 | 3.852  | Tgfb14               | 3.2096  | 3.583   | 2.362   |
| Kif5b     | 2.9501 | 2.5511  | 2.506  | Tgfb3                | 2.2268  | 2.7117  | 3.054   |
| Knat7     | 2.8827 | 2.36661 | 3.281  | Thbs2                | 0.6687  | 1.63209 | 9.191   |
| Kntc1     | 2.5985 | 2.19981 | 2.504  | Tmc5                 | 0.8434  | 2.229   | 24.299  |
| Kpna2     | 3.5553 | 3.06881 | 3.065  | Tmc7                 | 2.1061  | 2.4542  | 2.228   |
| Lcor1     | 2.9754 | 2.5518  | 2.652  | Tmem181a             | 2.6119  | 2.9942  | 2.411   |
| Lig1      | 3.5403 | 3.1652  | 2.371  | Tnfr1b               | 2.6427  | 2.9759  | 2.137   |
| Limk1     | 1.9497 | 1.1923  | 5.72   | Tnfrsf22             | 1.6916  | 2.20239 | 3.241   |
| Litaf     | 2.4372 | 1.97471 | 2.9    | Tnfrsf13             | 1.0985  | 1.9293  | 6.773   |
| Lmnb1     | 3.2653 | 2.83491 | 2.693  | Trpm3                | 0.9099  | 1.0627  | 9.371   |
| LOC239447 | 1.5487 | 0.53391 | 10.346 | Usp30                | 2.1221  | 2.4797  | 2.278   |
| LOC433671 | 2.7287 | 2.42341 | 2.019  | Uty                  | -0.0658 | 2.0739  | 137.943 |
| Lpl       | 1.8562 | 0.89221 | 9.204  | Vlrb8                | 0.2311  | 1.181   | 8.91    |
| Lrr1      | 2.5883 | 1.8924  | 4.964  | Vll                  | 2.1231  | 2.4506  | 2.125   |
| Mad2l1    | 3.3738 | 2.9652  | 2.562  | Xp9300               | 0.303   | 1.3133  | 10.24   |
| Maneal    | 1.3698 | 0.3469  | 10.541 | Xlr // 3830403N18Rik | 2.4381  | 2.76909 | 2.142   |
| Mastl     | 2.3094 | 1.7933  | 3.281  | Ypel4                | 0.8999  | 1.90149 | 10.036  |
| Mbnl3     | 2.9509 | 2.5801  | 2.348  | Zfx4                 | 0.2018  | 1.32549 | 13.295  |
| Mec       | 2.9313 | 2.5262  | 2.541  | Zfp93                | 0.5036  | 1.5318  | 10.617  |
| Mcm10     | 3.037  | 2.518   | 3.303  | Zic2                 | 0.1393  | 1.1567  | 10.408  |
| Mcm2      | 3.0814 | 2.73951 | 2.197  | 0610042C05Rik        | 3.0439  | 3.3942  | 2.24    |
| Mcm3      | 3.7182 | 3.384   | 2.158  | 1110012N22Rik        | 0.7994  | 1.915   | 13.049  |
| Mcm5      | 3.361  | 2.98441 | 2.38   | 1110033O09Rik        | 2.4434  | 2.9138  | 2.953   |
| Mcp4b     | 1.9904 | 1.18251 | 6.425  | 1110051K18Rik        | 2.8658  | 3.2221  | 2.271   |
| Megf9     | 2.7981 | 2.48461 | 2.058  | 1500005K14Rik        | 2.3716  | 2.76109 | 2.451   |
| Meik      | 2.7504 | 2.1738  | 3.772  | 1700016F23Rik        | 2.2446  | 2.55369 | 2.037   |
| MGC65590  | 3.0869 | 2.7222  | 2.315  | 1700025E21Rik        | 0.8017  | 1.7602  | 9.088   |
| Mie1      | 3.0375 | 2.4245  | 4.102  | 1700034I23Rik        | 2.1922  | 2.5229  | 2.192   |
| Mja1l     | 1.597  | 0.436   | 14.487 | 1700041C02Rik        | 1.6451  | 2.14139 | 3.135   |
| Mkks      | 2.2883 | 1.7327  | 3.594  | 1700048O20Rik        | 3.5887  | 3.92859 | 2.187   |
| Mmp1a     | 0.9849 | 0.0261  | 9.094  | 1700067C01Rik        | 0.4422  | 1.4994  | 11.405  |
| Mmp8      | 2.4904 | 2.1811  | 2.038  | 1700094D03Rik        | 2.2281  | 2.5358  | 2.013   |
| Mphosph1  | 3.4846 | 3.06651 | 2.618  | 1700095F04Rik        | -0.8378 | 0.3301  | 14.719  |
| Mthfd1    | 2.6309 | 2.2199  | 2.576  | 1700110K17Rik        | 1.8204  | 2.3393  | 3.302   |
| Mthfd2    | 2.6436 | 2.2847  | 2.285  | 1810019A08Rik        | 2.7296  | 3.1107  | 2.404   |
| Mxd3      | 2.7053 | 1.8176  | 7.721  | 2010001J22Rik        | 2.0822  | 2.4567  | 2.368   |
| Myb1      | 2.8287 | 2.0463  | 6.058  | 2010109A12Rik        | 1.8108  | 2.213   | 2.524   |
| Myh11     | 2.1954 | 1.72941 | 2.924  | 2010309G21Rik        | 3.36    | 3.748   | 2.443   |
| Nasp      | 2.032  | 1.3339  | 4.989  | 2310010117Rik        | 2.1379  | 2.51679 | 2.392   |
| Nbs4      | 2.4876 | 0.4882  | 9.986  | 2310047D07Rik        | 0.853   | 1.7939  | 8.727   |
| Nek2      | 2.9098 | 2.39701 | 3.256  | 2410018M08Rik        | 1.2071  | 2.08919 | 7.622   |
| Net1      | 2.6033 | 2.195   | 2.56   | 2610024A01Rik        | 2.7906  | 3.1675  | 2.381   |
| Ngp       | 3.4884 | 3.154   | 2.159  | 2610042O14Rik        | 1.9418  | 2.3304  | 2.446   |
| Nnyc1     | 2.142  | 1.55081 | 3.901  | 2810055G20Rik        | 1.5441  | 2.177   | 4.284   |
| Nr4a2     | 1.0927 | 0.1473  | 8.838  | 2810422M04Rik        | 2.4349  | 2.8327  | 2.499   |
| Nrm       | 3.2654 | 2.90181 | 2.309  | 2810457G06Rik        | 1.1496  | 1.8812  | 5.39    |
| Nucks1    | 3.0376 | 2.61921 | 2.62   | 2900056M20Rik        | 2.4832  | 2.8799  | 2.492   |
| Nudt4     | 2.9671 | 2.65261 | 2.062  | 2900075B16Rik        | 2.2857  | 2.6359  | 2.239   |
| Nup54     | 1.82   | 0.7251  | 12.442 | 3110005L21Rik        | 1.4307  | 2.2143  | 6.075   |
| Nusap1    | 3.5751 | 2.89741 | 4.76   | 3110007P09Rik        | 0.9475  | 1.83749 | 7.762   |
| Ogn       | 2.268  | 1.61291 | 4.519  | 3222402N08Rik        | 0.2746  | 1.6964  | 26.411  |
| Paln      | 2.3611 | 1.79781 | 3.658  | 4632415K11Rik        | 1.2557  | 2.01779 | 5.782   |
| Pawr      | 1.0861 | -0.0892 | 41.972 | 4731417B20Rik        | 1.6342  | 2.1294  | 3.127   |
| Paxip1    | 2.9997 | 2.68581 | 2.06   | 4921525L17Rik        | 0.8214  | 1.8465  | 10.594  |
| Pbk       | 3.4521 | 2.84251 | 4.069  | 4921525O09Rik        | 2.156   | 2.61289 | 2.863   |
| Pcna      | 2.1764 | 1.5316  | 4.413  | 4921529O18Rik        | 1.7186  | 2.208   | 3.086   |
| Pdp1      | 2.457  | 2.02151 | 2.725  | 4930447C04Rik        | 1.9267  | 2.7569  | 6.763   |
| Pglyrp1   | 2.5886 | 2.2716  | 2.074  | 4930447F04Rik        | -0.0992 | 1.0198  | 13.152  |
| Pgr       | 2.3055 | 1.6527  | 4.495  | 4930525K21Rik        | 2.9696  | 3.35299 | 2.417   |
| Phka1     | 2.5444 | 2.2255  | 2.084  | 4930539E08Rik        | 2.7335  | 3.17049 | 2.735   |
| Pknox1    | 3.2413 | 2.92871 | 2.053  | 4933426S08Rik        | 2.0939  | 2.64599 | 3.565   |
| Pkp4      | 2.9041 | 2.4627  | 2.763  | 4933437K13Rik        | 2.3088  | 2.63119 | 2.1     |
| Plekhh1   | 2.4727 | 1.6377  | 6.839  | 5730510P18Rik        | -0.1617 | 0.97209 | 13.607  |
| Pik1      | 2.5884 | 2.2186  | 2.343  | 5830405M20Rik        | 1.9454  | 2.3237  | 2.389   |
| Pik4      | 3.0425 | 2.5143  | 3.374  | 5830428M24Rik        | 2.6059  | 2.93489 | 2.132   |
| Pola1     | 1.8161 | 0.4813  | 21.617 | 5830431A10Rik        | 2.6889  | 3.0807  | 2.464   |
| Pold2     | 2.7766 | 2.4005  | 2.377  | 5930405F01Rik        | 2.4204  | 2.7456  | 2.114   |
| Pole2     | 2.4676 | 2.1393  | 2.129  | 6330512M04Rik        | 1.1449  | 2.0874  | 8.759   |
| Poiq      | 2.5519 | 2.18231 | 2.342  | 7530414M10Rik        | 0.79    | 1.9321  | 13.81   |
| Ppi5      | 2.959  | 2.2473  | 5.148  | 9130020L07Rik        | 0.3315  | 1.3218  | 9.779   |
| Prc1      | 3.169  | 2.5074  | 4.587  | 9230111I22Rik        | 2.4635  | 2.7885  | 2.113   |
| Prim1     | 3.518  | 3.14951 | 2.336  | 9430032J07Rik        | 3.0873  | 3.47299 | 2.43    |
| Prkcn     | 2.5991 | 2.27431 | 2.112  | 9930013L23Rik        | 0.2301  | 1.5055  | 18.853  |
| Pvph      | 3.1186 | 2.81481 | 2.012  |                      |         |         |         |
| Pvrl3     | 1.9028 | 1.0075  | 7.857  |                      |         |         |         |
| Racgap1   | 2.9483 | 2.1556  | 6.204  |                      |         |         |         |
| Rad21     | 3.4011 | 3.05981 | 2.194  |                      |         |         |         |
| Rad52b    | 2.7174 | 2.30021 | 2.613  |                      |         |         |         |
| Rad54b    | 2.9613 | 2.57981 | 2.407  |                      |         |         |         |
| Rad54l    | 2.9569 | 2.5739  | 2.415  |                      |         |         |         |
| Rasl11b   | 2.087  | 1.2063  | 7.598  |                      |         |         |         |
| Rassf2    | 2.1519 | 1.63511 | 3.286  |                      |         |         |         |
| Rbl1      | 3.1743 | 2.8073  | 2.328  |                      |         |         |         |
| Rbm14     | 2.7773 | 2.4103  | 2.328  |                      |         |         |         |
| Rbm16     | 3.0491 | 2.7349  | 2.061  |                      |         |         |         |
| Rbp1      | 2.236  | 1.81871 | 2.613  |                      |         |         |         |
| Recq4     | 2.3868 | 2.0099  | 2.381  |                      |         |         |         |
| Retnla    | 2.6936 | 2.3434  | 2.239  |                      |         |         |         |
| Rfc4      | 3.2865 | 2.9146  | 2.354  |                      |         |         |         |
| Rim2      | 1.2985 | 0.2429  | 11.365 |                      |         |         |         |
| Ris2      | 3.3834 | 3.0728  | 2.044  |                      |         |         |         |
| Rnase2    | 0.8519 | -0.0891 | 8.729  |                      |         |         |         |
| Rnf127    | 2.1566 | 0.6502  | 32.092 |                      |         |         |         |

|                                |        |         |        |
|--------------------------------|--------|---------|--------|
| Rnf144                         | 1.9121 | 1.1183  | 6.22   |
| Rnf2                           | 1.6768 | 0.7681  | 8.104  |
| Rnf26                          | 3.1615 | 2.8083  | 2.255  |
| Rrm2                           | 3.5728 | 3.04971 | 3.334  |
| S100a1                         | 2.3923 | 2.0499  | 2.199  |
| Scgn                           | 2.2374 | 1.83341 | 2.535  |
| Scm2                           | 1.7253 | 0.6628  | 11.547 |
| Scm3                           | 2.5741 | 2.26861 | 2.02   |
| Sema3d                         | 0.7309 | -0.3612 | 12.362 |
| Serping1                       | 1.8054 | 0.7137  | 12.35  |
| Sf3a1                          | 2.5923 | 2.27961 | 2.054  |
| Sfmbt1                         | 2.4781 | 2.0557  | 2.644  |
| Sgol1                          | 2.4342 | 1.8544  | 3.8    |
| Sgol2                          | 3.0961 | 2.5519  | 3.501  |
| Shcbp1                         | 3.2911 | 2.737   | 3.581  |
| Siah2                          | 2.3246 | 1.9846  | 2.187  |
| Siat7c                         | 2.4866 | 1.0982  | 24.456 |
| Sik3                           | 2.2268 | 1.78491 | 2.766  |
| Skp2                           | 3.1145 | 2.782   | 2.15   |
| Slc16a8                        | 2.0589 | 1.9981  | 4.592  |
| Slc19a2                        | 2.6016 | 2.19791 | 2.533  |
| Slc1a1                         | 1.3846 | 0.2515  | 13.586 |
| Slc6a4                         | 1.3612 | 0.34031 | 10.492 |
| Slc9a5                         | 2.1898 | 1.1637  | 10.619 |
| Slc04a1                        | 2.6361 | 2.32811 | 2.032  |
| Sifn3 /// Sifn4                | 2.5594 | 2.15921 | 2.512  |
| Smc2l1                         | 3.3777 | 2.8968  | 3.026  |
| Smurf1                         | 2.3062 | 1.8276  | 3.01   |
| Soat                           | 3.5502 | 3.1963  | 2.258  |
| Spag5                          | 2.7648 | 1.8732  | 7.791  |
| Spire1                         | 1.2678 | 0.2803  | 9.716  |
| Spp1                           | 2.4399 | 1.8672  | 3.738  |
| Stag1                          | 2.4317 | 2.0225  | 2.507  |
| Stk6                           | 2.9251 | 2.3021  | 4.197  |
| Stxbp5                         | 3.0308 | 2.7204  | 2.043  |
| Suv39h1                        | 3.1462 | 2.7318  | 2.596  |
| Syme2                          | 2.3245 | 1.784   | 3.471  |
| Syt7                           | 2.5926 | 2.0742  | 3.299  |
| Tacc3                          | 2.7444 | 1.78651 | 9.075  |
| Tceb3bp1                       | 2.2654 | 1.6446  | 4.176  |
| Tcf19                          | 3.3134 | 2.8439  | 2.947  |
| Tfb1m                          | 2.6221 | 2.2456  | 2.379  |
| Timeless                       | 3.1899 | 2.8854  | 2.016  |
| Tjp2                           | 1.999  | 0.8694  | 13.477 |
| Tmpo                           | 3.3967 | 2.91041 | 3.064  |
| Tnfrsf6                        | 0.7763 | -0.2591 | 10.849 |
| Tnfrsf8                        | 2.751  | 2.36531 | 2.43   |
| Tnfrsf6                        | 1.8611 | 0.62151 | 17.361 |
| Top2a                          | 3.743  | 3.12501 | 4.149  |
| Tpbp                           | 0.8035 | -0.3506 | 14.259 |
| Tpx2                           | 3.4338 | 2.8049  | 4.255  |
| Traf1                          | 2.19   | 1.5791  | 4.082  |
| Tnn5b                          | 3.5676 | 3.1879  | 2.397  |
| Trip13                         | 3.1544 | 2.72791 | 2.669  |
| Troap                          | 2.3179 | 1.26961 | 11.176 |
| Ttf2                           | 3.1412 | 2.78141 | 2.289  |
| Ttk                            | 2.9799 | 2.26331 | 5.207  |
| Tubb6                          | 3.9782 | 3.6498  | 2.13   |
| Tubb5                          | 3.8086 | 3.4957  | 2.055  |
| Tyms                           | 2.4736 | 1.883   | 3.895  |
| Tyms-ps                        | 2.7901 | 2.30111 | 3.083  |
| Ubp1                           | 3.4283 | 3.0094  | 2.623  |
| Ubp2l                          | 1.7445 | 0.7339  | 10.247 |
| Ube2c                          | 3.6947 | 3.1254  | 3.709  |
| Utp14b                         | 2.6558 | 2.2493  | 2.549  |
| Uts1                           | 2.4337 | 2.11411 | 2.087  |
| V1rc4                          | 1.2405 | 0.1095  | 13.52  |
| Vars2                          | 2.4444 | 2.10461 | 2.186  |
| Wdh1                           | 3.2759 | 2.8975  | 2.29   |
| Wee1                           | 3.1019 | 2.7744  | 2.125  |
| Whsc1                          | 2.9117 | 2.4921  | 2.627  |
| Zfp367                         | 2.5147 | 2.0296  | 3.055  |
| Zfp41                          | 2.5434 | 2.0438  | 3.159  |
| Zhu3                           | 2.4431 | 2.02071 | 2.644  |
| Zranb3                         | 2.4224 | 2.022   | 2.514  |
| 1110001A07Rik                  | 3.1678 | 2.8426  | 2.114  |
| 1110002E23Rik                  | 2.3931 | 1.9897  | 2.531  |
| 1110025F24Rik                  | 2.8402 | 2.53601 | 2.014  |
| 1110030H18Rik                  | 1.6196 | 0.5154  | 12.711 |
| 1190002N15Rik                  | 2.626  | 2.0214  | 4.023  |
| 1200008D12Rik                  | 2.9836 | 2.25851 | 5.309  |
| 1600002H07Rik                  | 1.9547 | 1.2768  | 4.763  |
| 1700017B05Rik                  | 2.4451 | 2.06301 | 2.41   |
| 1700019E19Rik                  | 2.4688 | 1.5086  | 9.124  |
| 1700022C02Rik                  | 2.9648 | 2.41191 | 3.571  |
| 1700025G04Rik                  | 2.2383 | 1.5501  | 4.877  |
| 1700054N08Rik                  | 3.1019 | 2.5334  | 2.3971 |
| 1700108L22Rik                  | 2.6594 | 2.29421 | 2.318  |
| 1810022O10Rik                  | 2.1731 | 1.48591 | 4.866  |
| 2010317E24Rik                  | 3.1035 | 2.5189  | 3.842  |
| 231001016Rik /// 2010012P02Rik | 1.1281 | 0.1036  | 10.58  |
| 2310022K01Rik                  | 2.5413 | 2.2113  | 2.137  |
| 2310031L18Rik                  | 3.105  | 2.64041 | 2.914  |
| 2310034L04Rik                  | 2.8083 | 2.42451 | 2.419  |
| 2310038K02Rik                  | 2.092  | 1.4404  | 4.483  |
| 2310043D08Rik                  | 3.1102 | 2.59471 | 3.277  |
| 2310061C15Rik                  | 2.7421 | 2.26061 | 3.03   |
| 2310061N23Rik                  | 3.5018 | 3.079   | 2.647  |
| 2410030K01Rik                  | 3.5296 | 3.02241 | 3.215  |
| 2410078J06Rik                  | 3.0901 | 2.7588  | 2.144  |
| 2510015F01Rik                  | 3.0874 | 2.6022  | 3.056  |
| 2600001117Rik                  | 2.6902 | 2.1327  | 3.609  |

2600017H08Rik  
 2610002D18Rik  
 2610019I03Rik  
 2610021K21Rik  
 2610036L11Rik  
 2610300B10Rik  
 2610305I24Rik  
 2610306H15Rik  
 2610318C08Rik  
 2610318N02Rik  
 2610510I17Rik  
 2700049P18Rik  
 2700084L22Rik  
 2700099C18Rik  
 2810027O19Rik  
 2810406C15Rik  
 2810408I11Rik  
 2810417H13Rik  
 2810418N01Rik  
 2810433K01Rik  
 2810465G24Rik  
 2810475A17Rik  
 2900042O04Rik  
 2900073H19Rik  
 2900078E11Rik  
 2900092N22Rik  
 3000004C01Rik  
 3110010F15Rik  
 4122402O22Rik  
 4432406C08Rik  
 4632428N05Rik  
 4632434I11Rik  
 4833416E15Rik  
 4833432M17Rik  
 4921515A04Rik  
 4921515L22Rik  
 4930403J22Rik  
 4930414L22Rik  
 4930542G03Rik  
 4930547N16Rik  
 4930579C24Rik  
 4930579H20Rik  
 4930584N22Rik  
 4932411G06Rik  
 4933413E19Rik  
 4933424N09Rik  
 5430413I02Rik  
 5730469M10Rik  
 5730505K17Rik  
 5730507H05Rik  
 5730547N13Rik  
 5730564G15Rik  
 5730590G19Rik  
 5830426I05Rik  
 5830433M15Rik  
 5830483C08Rik  
 6030408C04Rik  
 6230425F05Rik  
 6330417G03Rik  
 6330503K22Rik  
 6530407C02Rik  
 6720460Q22Rik  
 6720463M24Rik  
 6820428D13  
 6820443O06Rik  
 8430438L13Rik  
 9130019I15Rik  
 9230115E21Rik  
 9330169L03Rik  
 9330182L06Rik  
 9430021M05Rik  
 9430038I01Rik  
 9630013D21Rik

3.5048  
 2.5596  
 2.6158  
 1.8202  
 2.9118  
 2.6087  
 2.4973  
 2.7761  
 3.3497  
 2.8204  
 2.7061  
 2.6229  
 2.6549  
 3.1031  
 3.0685  
 3.1381  
 2.9115  
 2.9449  
 3.531  
 2.9124  
 2.3681  
 2.4383  
 2.2877  
 2.3835  
 0.9184  
 1.9054  
 2.9611  
 3.0063  
 2.9926  
 3.2847  
 2.231  
 2.8102  
 1.6483  
 2.4097  
 2.3219  
 2.197  
 2.8658  
 1.5417  
 3.3377  
 2.4697  
 3.313  
 0.9042  
 2.8852  
 2.2718  
 2.928  
 2.7884  
 2.6611  
 3.1777  
 3.5011  
 3.4846  
 2.925  
 2.8023  
 2.6173  
 3.47  
 2.5792  
 3.0828  
 2.8129  
 2.7717  
 0.9576  
 2.9168  
 2.6929  
 2.4167  
 2.9171  
 2.8675  
 1.9046  
 2.9522  
 2.1598  
 1.9605  
 0.8468  
 1.5013  
 1.0969  
 2.4561  
 2.3132

2.8667  
 2.1155  
 2.2584  
 0.3023  
 2.57411  
 2.07451  
 2.1366  
 1.8163  
 2.7303  
 2.443  
 2.1537  
 2.17411  
 2.1601  
 2.7298  
 2.6838  
 2.4593  
 2.3682  
 2.4205  
 3.215  
 2.19451  
 1.9652  
 1.91421  
 1.8634  
 1.985  
 -0.12259  
 1.0648  
 2.26251  
 2.6668  
 2.688  
 2.42981  
 1.56361  
 2.4476  
 0.55481  
 1.99921  
 1.72771  
 1.3738  
 2.55901  
 0.4032  
 2.89841  
 2.02851  
 2.9707  
 -0.1019  
 2.5553  
 1.83521  
 2.125  
 2.4772  
 2.1093  
 2.2896  
 3.0686  
 2.88451  
 2.50911  
 2.47021  
 2.1338  
 3.03091  
 1.8595  
 2.5158  
 2.32651  
 2.4034  
 -0.1086  
 2.6049  
 2.33041  
 1.8678  
 2.60341  
 2.5406  
 1.01571  
 2.46701  
 1.1594  
 1.0235  
 -0.4237  
 0.1333  
 0.05351  
 2.1513  
 1.3104

4.346  
 2.78  
 2.277  
 32.953  
 2.176  
 3.421  
 2.294  
 9.115  
 4.162  
 2.384  
 3.567  
 2.81  
 3.124  
 2.362  
 2.424  
 4.773  
 3.493  
 3.345  
 2.07  
 5.222  
 2.528  
 3.342  
 2.656  
 2.503  
 10.989  
 6.927  
 4.995  
 2.185  
 2.016  
 7.159  
 4.649  
 2.304  
 12.401  
 2.573  
 3.928  
 6.655  
 2.026  
 13.756  
 2.749  
 2.761  
 2.199  
 10.141  
 2.137  
 2.732  
 6.353  
 2.047  
 3.562  
 7.728  
 2.707  
 3.981  
 2.605  
 2.148  
 3.044  
 2.748  
 5.244  
 3.689  
 3.064  
 2.335  
 11.646  
 2.05  
 2.304  
 3.539  
 2.059  
 2.122  
 7.742  
 3.056  
 10.009  
 8.649  
 18.642  
 23.344  
 11.05  
 2.017  
 10.064

**TABLE S2****Powers et al. 2012**

Primers used in the study.

| <b>Quantitative PCR</b>  |                                                     |
|--------------------------|-----------------------------------------------------|
| Cyclin D2-Fw             | 5'-AGC TGT CCC TGA TCC GCA AG-3'                    |
| Cyclin D2-Rev            | 5'-GCA GCT CTG TCA GGG CAT CA-3'                    |
| Cyclin D3-Fw             | 5'-CGC TGC GAG GAG GAT GTC TT-3'                    |
| Cyclin D3-Rev            | 5'-CAA CTG CCA TGG AGC CAC AG-3'                    |
| Cyclin E1-Fw             | 5'-TGG ATT GGC TAA TGG AGG TGT G-3'                 |
| Cyclin E1-Rev            | 5'-AAG GCT GAA ATC CCA ATA AGC TGT-3'               |
| Cyclin E-Fw              | 5'-CCC CAG GAC TGC ATT TCA GC-3'                    |
| Cyclin E-Rev             | 5'-TGA CGC TGC AGA AAG TGC TCA-3'                   |
| Cyclin A2-Fw             | 5'-GCT TGT AGG CAC GGC TGC TA-3'                    |
| Cyclin A2-Rev            | 5'-CTG TTG GTG CAG CCA AGT CA-3'                    |
| Igkv1-117-Fw             | 5'-GCC TGT TAG GCT GTT GGT GCT-3'                   |
| Igkv1-117-Rev            | 5'-GCT TTG GAG ACT GGC CTG GT-3'                    |
| Igh-VJ558-Fw             | 5'-TGA GGA GCT GTC CCC AGA AA-3'                    |
| Igh-VJ558-Rev            | 5'-TAC CCG ACA GAC GGT CGA TG-3'                    |
| Iglv1-Fw                 | 5'-TCT CAG CTC AGG GGC CAT TT-3'                    |
| Iglv1-Rev                | 5'-CAC CTG GAG CTC GGT TGT TG-3'                    |
| Igk Germline-Fw          | 5'-GAG GGG GTT AAG CTT TCG CCT ACC CAC-3'           |
| Igk Germline-Rev         | 5'-GTT ATG TCG TTC ATA CTC GTC CTT GGT CAA-3'       |
| cdkn1b-Fw                | 5'-GGC AGC TTG CCC GAG TTC TA-3'                    |
| cdkn1b-Rev               | 5'-TCG CTT CCT CAT CCC TGG AC-3'                    |
| B-2Microglobulin-Fw      | 5'-AGA CTG ATA CAT ACG CCT GCA-3'                   |
| B-2Microglobulin-Rev     | 5'-GCA GGT TCA AAT GAA TCT TCA-3'                   |
| degVk                    | 5'-GGC TGC AGS TTC AGT GGC AGT GGR TCW GGR AC-3'    |
| k-J1-R                   | 5'-AGC ATG GTC TGA GCA CCG AGT AAA GG-3'            |
| Q-iEnhL                  | 5'-AGA AGT GAA GTC TGC CAG TT-3'                    |
| Q-iEnhR                  | 5'-GTA ACC ACA TGG GAC AAT TT-3'                    |
| V <sub>H</sub> J558-Fw   | 5'-CGA GCT CTC CAR CAC AGC CTW CAT GCA RCT CAR C-3' |
| V <sub>H</sub> 7183-Fw   | 5'-CGG TAC CAA GAA SAM CCT GTW CCT GCA AAT GAS C-3' |
| V <sub>H</sub> Q52-Fw    | 5'-CGG TAC CAG ACT GAR CAT CAS CAA GGA CAA YTC C-3' |
| V <sub>H</sub> Gam3.8-Fw | 5'-CAA GGG ACG GTT TGC CTT CTC TTT GGA A-3'         |

|                        |                                                     |
|------------------------|-----------------------------------------------------|
| V <sub>H</sub> 3609-Fw | 5'-KCY YTG AAG AGC CRR CTC ACA ATC TCC-3'           |
| J <sub>H</sub> 3-Rev   | 5'-GTC TAG ATT CTC ACA AGA GTC CGA TAG ACC CTG G-3' |
| Igkv2-137-Fw           | 5'-CTG AGT TCC TGG GGC TGC TT-3'                    |
| Igkv2-137-Rev          | 5'-TGG CCT CTG CAG GAA CCA AT-3'                    |
| Igkv9-120-Fw           | 5'-TGA GGG CTC CTG CAC AGA TT-3'                    |
| Igkv9-120-Rev          | 5'-ATG TCC TGA CTT GCC CGA CA-3'                    |
| Igkv13-85-Fw           | 5'-TTC TGC TCT TCC TGC TGT TCA GA-3'                |
| Igkv13-85-Rev          | 5'-GGA GCA TTT CCT GGT TTC TGC-3'                   |
| Igkv4-70-Fw            | 5'-TGC AGA TTT TCA GCT TCC TGC T-3'                 |
| Igkv4-70-Rev           | 5'-CTC CCC TGG AGA TGC AGA CA-3'                    |
| Igkv12-41-Fw           | 5'-ACT CAG GTC CTG GCG TTG CT-3'                    |
| Igkv12-41-Rev          | 5'-TTG CTC GAC ATG TGA TGG TGA-3'                   |
| Igkv3-5-Fw             | 5'-GCT GCT CTG GGT TCC AGG TT-3'                    |
| Igkv3-5-Rev            | 5'-GGA GTT TGG GTG GCT GTC CT-3'                    |
| Igkv3-1-Fw             | 5'-CTG CTA TGG GTG CTG CTG CT-3'                    |
| Igkv3-1-Rev            | 5'-TGC AGG AGA TGG TGG CTC TC-3'                    |
| N chimera-Fw           | 5'-CCA GCG TGT CCT GCA GAG TT-3'                    |
| N chimera-Rev          | 5'-TCA CAC ACC TCC AGC ATC CA-3'                    |
| C chimera-Fw           | 5'-GCC TAG GCG CCT GCT CTA TG-3'                    |
| C chimera-Rev          | 5'-CAG CTT CCC TGA GGC TCT CC-3'                    |
